# Supplementary material for: Socioeconomic barriers limit the adaptive role of biodiversity in cacao agroforestry systems in Southern Mexico
Source: Research Square preprint supplement (doi:10.21203/rs.3.rs-7982748/v1), 2025-11-13
Supplement: Supplementary file 1 [file 026e24d1e939e8b12593f856.xlsx]

## Sheet: TableS1
Table S1.- Services and subservices at cacao agroforestry systems of Tabasco with low (LDS) and high (HDS) diversity. The P-value is result of a two proportions Z test.
Service	Code	Subservice	LDS	HDS	Total	P-value	Percentaje by type of service	Total percentaje
Cultural	C1	Rooted with the activity	3	2	5	0.5488	55.5556	7.93651
	C2	Stay activate in the retirement	0	1	1	0.5488	11.1111	1.5873
	C2	Nostalgia	2	0	2	0.2231	22.2222	3.1746
	C4	Religious	0	1	1	0.5488	11.1111	1.5873
	Cultural total		5	4	9	0.9149	100	14.2857
Provisioning	P1	Cacao self-consumption	3	3	6	NA	14.2857	9.52381
	P2	Fruit self-consumption	3	3	6	NA	14.2857	9.52381
	P3	Firewood self-consumption	3	1	4	0.2231	9.52381	6.34921
	P4	Wood self-consumption	3	2	5	0.5488	11.9048	7.93651
	P5	Allspice self-consumption	1	1	2	1	4.7619	3.1746
	P6	Fence self-consumption	2	1	3	0.7165	7.14286	4.7619
	P7	Cacao sell	3	3	6	NA	14.2857	9.52381
	P8	Fruit sell	1	0	1	0.5488	2.38095	1.5873
	P9	Firewood sell	2	0	2	0.2231	4.7619	3.1746
	P10	Wood sell	3	0	3	0.04979*	7.14286	4.7619
	P11	Allspecie sell	1	1	2	1	4.7619	3.1746
	P12	Fence sell	2	0	2	0.2231	4.7619	3.1746
	Provisioning total		27	15	42	0.01634*	100	66.6667
Regulating	R1	Cacao diversity maintainance	3	1	4	0.2231	40	6.34921
	R2	Shade trees microclimate	3	3	6	NA	60	9.52381
	Regulating total		6	4	10	0.6376	100	15.873
Supporting	S1	Polinization	1	0	1	0.5488	50	1.5873
	S2	Oxigen production	1	0	1	0.5488	50	1.5873
	Supporting total		2	0	2	1	100	3.1746
		Total	40	23	63	0.02771*	-	100

## Sheet: TableS2
Table S2.- General and specific problematics at cacao agroforestry systems of Tabasco with low (LDS) and high (HDS) diversity. The P-value is result of a two proportions Z test.
General problematics	Code	Specific problematics	LDS	HDS	Total	P-value	Percentaje by type of service	Total percentaje
Climatic variability and cacao production	C1	Death and low production of cacao plantsdue droughts	2	2	4	1	33.3333	12.1212
	C2	Frosty pod rot and black pod	1	1	2	1	16.6667	6.06061
	C3	Fungal diseases intensification due cold fronts	3	2	5	0.5488	41.6667	15.1515
	C4	Squirrels	0	1	1	0.5488	8.33333	3.0303
	Total climate variability problematics		6	6	12	1	100	36.3636
Production	P1	Atomization of the plantaions	2	0	2	0.2231	66.6667	6.06061
	P2	Low quantity of fruit trees	0	1	1	0.5488	33.3333	3.0303
	Total production problematics		2	1	3	0.8007	100	9.09091
Rentability	R1	Low prices of cacao and sell to intermediaries	2	2	4	1	50	12.1212
	R2	Theft of cacao, bananas and agricultural equipment	2	0	2	0.2231	25	6.06061
	R3	Young people do not join to the activity	1	1	2	1	25	6.06061
	Total rentability problemtacs		5	3	8	0.6376	100	24.2424
Marketing routes	M1	Cacao germinates during its drying	0	1	1	0.5488	14.2857	3.0303
	M2	Consumers don´t buy the pepper	1	0	1	0.5488	14.2857	3.0303
	M3	Cooperatives don´t function properly and are closing	2	1	3	0.7165	42.8571	9.09091
	M4	Wood low prices and sell to intermediaries	1	1	2	1	28.5714	6.06061
	Total marketing routes problematics		4	3	7	0.9041	100	21.2121
Enviroment	E1	Pollution	1	1	2	1	66.6667	6.06061
	E2	Deforestation	1	0	1	0.5488	33.3333	3.0303
	Total enviroment problematics		2	1	3	0.8007	100	9.09091
	Total		19	14	33	0.5499	-	100

## Sheet: TableS3
Table S3.- Specific responses to climate season at cacao agroforestry systems of Tabasco with low (LDS) and high (HDS) diversity. The P-value is result of a two proportions Z test.
Climate seasons	Code	Specific responses	LDS	HDS	Total	P-value	Percentaje by type of service	Total percentaje
Droughts	D1	Cacao pruning in rains to prevent a major stress in droughts	1	0	1	0.5488	11.1111	6.25
	D2	Emergency irrigation	2	2	4	1	44.4444	25
	D3	Plant new cacao trees to replace death cacaos by drought	0	1	1	0.5488	11.1111	6.25
	D4	Specific fertilization to fortify the plants in droughts	1	1	2	1	22.2222	12.5
	D5	Use of wet fertilizers during droughts	1	0	1	0.5488	11.1111	6.25
	Total responses to drought		5	4	9	0.9237	100	56.25
Early drought	E1	Cacao pruning to avoid the fungal diseases	2	3	5	0.5488	83.3333	31.25
	E2	Application of copper sulfate to control fungal disease	1	0	1	0.5488	16.6667	6.25
	Total responses to early drought		3	3	6	1	100	37.5
Rainfalls	R1	Not applicate fertilizer in rains to prevent lixiviation	1	0	1	0.5488	100	6.25
	Total responses to rainfalls		1	0	1	0.5488	100	6.25
	Total		9	7	16	0.829	-	100

## Sheet: TableS4
Table S4.- Specific responses to general problematics at cacao agroforestry systems of Tabasco with low (LDS) and high (HDS) diversity. The P-value is result of a two proportions Z test.
General problematics	Code	Specific responses	LDS	HDS	Total	P-value	Percentaje by type of service	Total percentaje
Production	P1	Constant cacao trees renovation	0	2	2	0.2231	9.09091	4.54545
	P2	Selection of traditional cacao varieties resistant to fungal diseases	1	1	2	1	9.09091	4.54545
	P3	Recovery of traditional knowledge's	0	1	1	0.5488	4.54545	2.27273
	P4	Extended family helps with the management if the peasants gets sick	2	0	2	0.2231	9.09091	4.54545
	P5	Fertilizers given by the government	3	3	6	NA	27.2727	13.6364
	P6	Grafts given by the government	1	0	1	0.5488	4.54545	2.27273
	P7	Government technical advices to make organic inputs and plagues management	3	3	6	NA	27.2727	13.6364
	P8	Nongovernment technical advices to control frosty pod	1	1	2	1	9.09091	4.54545
	Total production responses		11	11	22	1	100	50
Rentability	R1	Complement its economy with other crops and/or economic activity	3	3	6	NA	42.8571	13.6364
	R2	Conserve the wood trees util they have an important size	1	0	1	0.5488	7.14286	2.27273
	R3	Surveillance rounds to prevent theft	2	1	3	0.7165	21.4286	6.81818
	R4	Government economic supports	3	1	4	0.2231	28.5714	9.09091
	Total rentability reponses		9	5	14	0.2537	100	31.8182
Marketing routes	M1	Sell of artisanal chocolates	0	2	2	0.2231	28.5714	4.54545
	M2	Safe part of the cacao to sale it when it scares	2	1	3	0.7165	42.8571	6.81818
	M3	Neighbors help to the transformation of cacao	0	1	1	0.5488	14.2857	2.27273
	M4	Government technical advice to the cacao transformation and economy	0	1	1	0.5488	14.2857	2.27273
	Total marketing routes responses		2	5	7	0.4035	100	15.9091
Enviroment	E1	Conserve the cacao agroforestry systems to compensate the deforestation	1	0	1	0.5488	100	2.27273
	Total enviroment responses		1	0	1	0.5488	100	2.27273
	Total		23	21	44	0.9232	-	100

## Sheet: TableS5
Table S5.- Specific responses to general problematics by actors at cacao agroforestry systems of Tabasco with low (LDS) and high (HDS) diversity. The P-value is result of a two proportions Z test.
Actors	General reponse	Code	Specific responses	LDS	HDS	Total	P-value	Percentaje by type of actor	Total percentaje
Own	Production	P1	Constant plantations renovation	0	2	2	0.2231	9.52381	4.54545
		P2	Selection of traditional cacao varieties resistant to fungal diseases	1	1	2	1	9.52381	4.54545
		P3	Recovery of traditional knowledge's	0	1	1	0.5488	4.7619	2.27273
	Rentability	R1	Complement its economy with other crops and/or economic activity	3	3	6	NA	28.5714	13.6364
		R2	Conserve the wood trees util they have an important size	1	0	1	0.5488	4.7619	2.27273
		R3	Surveillance rounds to prevent theft	2	1	3	0.7165	14.2857	6.81818
	Marketing routes	M1	Sell of artisanal chocolates	0	2	2	0.2231	9.52381	4.54545
		M2	Safe part of the cacao to sale it when it scares	2	1	3	0.7165	14.2857	6.81818
	Enviroment	E1	Conserve cacao agroforestry systems to compensate the deforestation	1	0	1	0.5488	4.7619	2.27273
	Total own responses			10	11	21	0.9618	100	47.7273
Family	Production	P4	Extended family helps with the management if the peasants gets sick	2	0	2	0.2231	100	4.54545
	Total family responses			2	0	2	0.2231	100	4.54545
Nongovernmental associations	Production	P8	Nongovernmental technical advices to control frosty pod	1	1	2	1	100	4.54545
	Total nongoverment associations reponses			1	1	2	1	100	4.54545
Community	Marketing routes	M3	Neighbors help to the transformation of cacao	0	1	1	0.5488	100	2.27273
	Total marketing routes responses			0	1	1	0.5488	100	2.27273
Goverment	Production	P5	Fertilizers given by the government	3	3	6	NA	33.3333	13.6364
		P6	Grafts given by the government	1	0	1	0.5488	5.55556	2.27273
		P7	Government technical advices to make organic inputs and plagues management	3	3	6	NA	33.3333	13.6364
	Rentability	R4	Government economic supports	3	1	4	0.2231	22.2222	9.09091
	Marketing routes	M4	Government technical advice to the cacao transformation and economy	0	1	1	0.5488	5.55556	2.27273
	Total goverment reponses			10	8	18	0.7575	100	40.9091
	Total			23	21	44	0.9232	-	100
